# Supplementary material for: Orchestration and Prognostic Significance of Immune Checkpoints in the Microenvironment of Primary and Metastatic Renal Cell Cancer
Source: Oxford University Press journal article supplement (doi:10.1158/1078-0432.ccr-14-2926), 2015-02-16
Supplement: 10780432ccr142926-sup-140522_1_supp_2811194_nhsy2t.xlsx [file 10780432ccr142926-sup-140522_1_supp_2811194_nhsy2t.xlsx]

## Sheet: Feuil1
	Table S1
	Primary ccRCC
	Number of Patients	135
	Males -No. (%)	98 (73%)
	Age (years)	61 ± 14
	Overall survival time (months)	47 ± 21
	Disease Free Survival (months)	40 ± 40
	Tumor size major axis (cm)	5.1 ± 3.1
	Sarcomatoid variant	18 (13%)
	TNM Stage
	I	49 (36%)
	II	10 (7%)
	III	53 (39%)
	IV	20 (15%)
	Unclassified	3 (2%)
	Fuhrman Grade
	I	5 (4%)
	II	33 (24%)
	III	78 (58%)
	IV	19 (14%)
	ccRCC Lung Metastases
	Number of Patients	51
	Males -No. (%)	42 (82%)
	Age (years)	64 ± 10
	Overall survival time (months)	42 ± 32
	Fuhrman Grade
	I	4 (8%)
	II	22 (33%)
	III	23 (37%)
	IV	12 (21%)
